# Supplementary material for: Mutational Signature and Integrative Genomic Analysis of Human Papillomavirus-Associated Penile Squamous Cell Carcinomas from Latin American Patients
Source: MDPI journal article supplement (doi:10.3390/cancers14143514), 2022-07-20
Supplement: s1 [file s1]

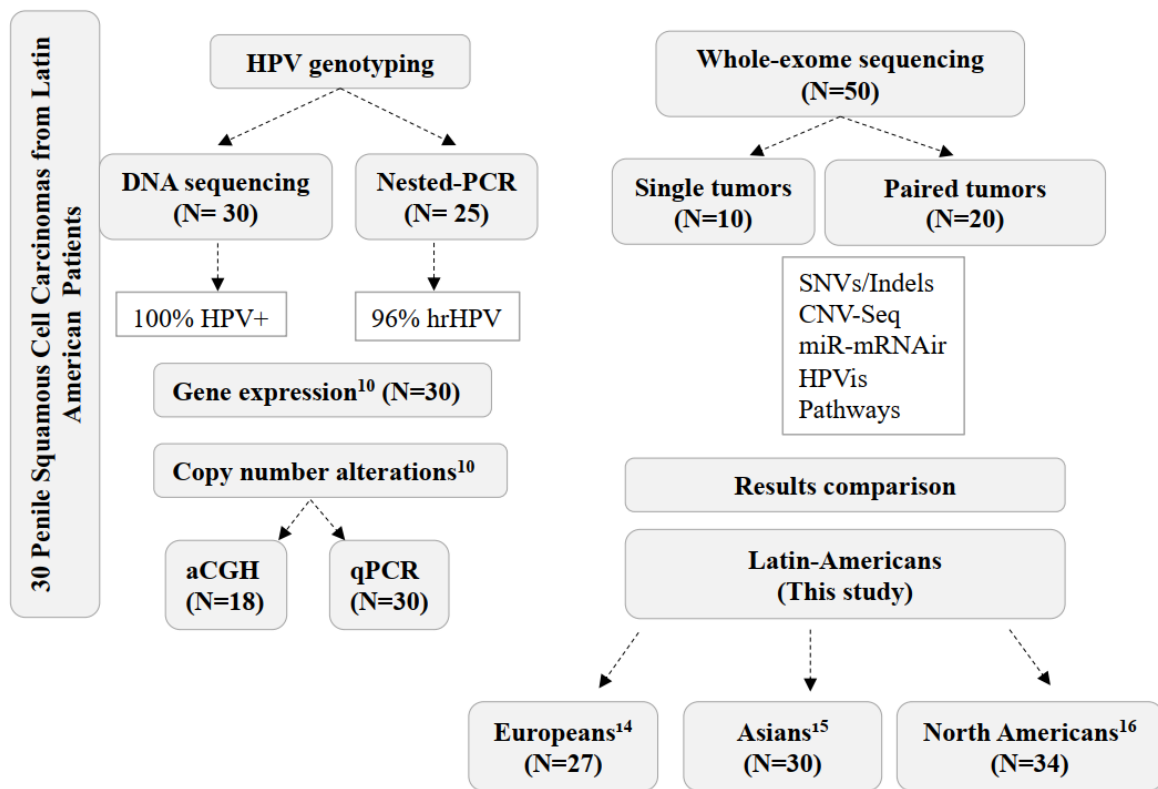

**Figure S1.** Flow chart representing the study design. Fresh penile squamous cell carcinomas were collected from 30. Latin American patients. Tumors were screened for Human Papillomavirus (HPV) infection, which were genotyped in most cases (5 cases yielded insufficient DNA). Whole-exome sequencing (WES) was performed in 20 paired tumors and adjacent normal tissues and 10 single tumors. Sequencing results were used for identifying somatic alterations in PSCCs. Further, enrichment of miRNA-mRNA interactive regions (miR-mRNAir) and HPV integration sites (HPVis) was performed. The copy number variants (CNV) were contrasted to previous CNA results of the same cases based on aCGH, with validation of selected genes by qPCR and RT-qPCR [10]. The mutated genes identified in this study were compared to those described by three previous studies reporting WES data from PeCa patients from Europe [14], Asia [15], and North America [16].

A

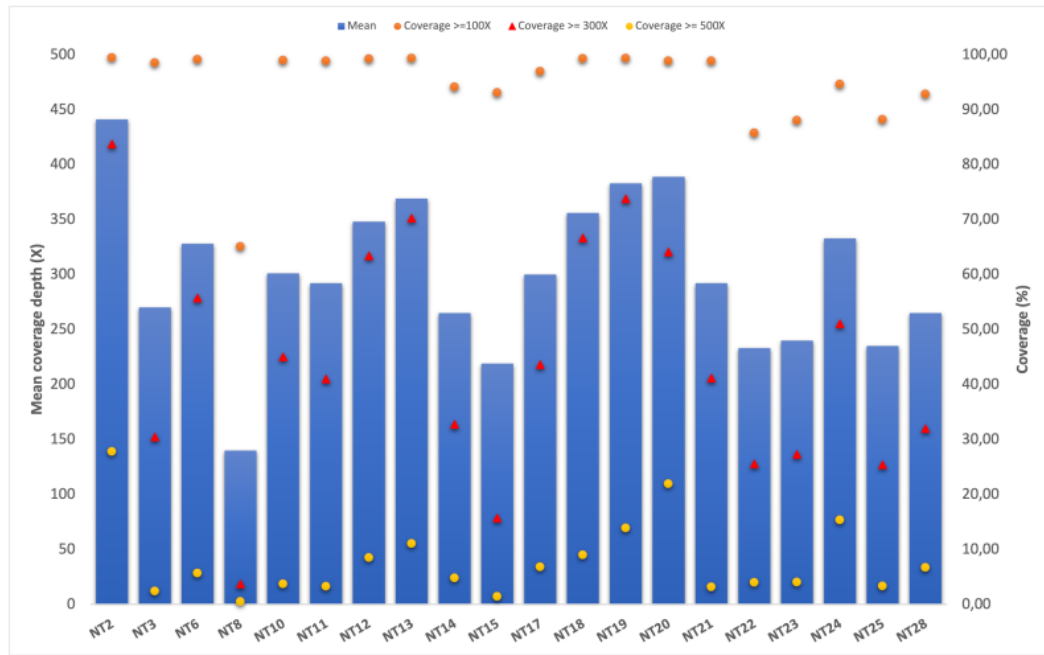

B

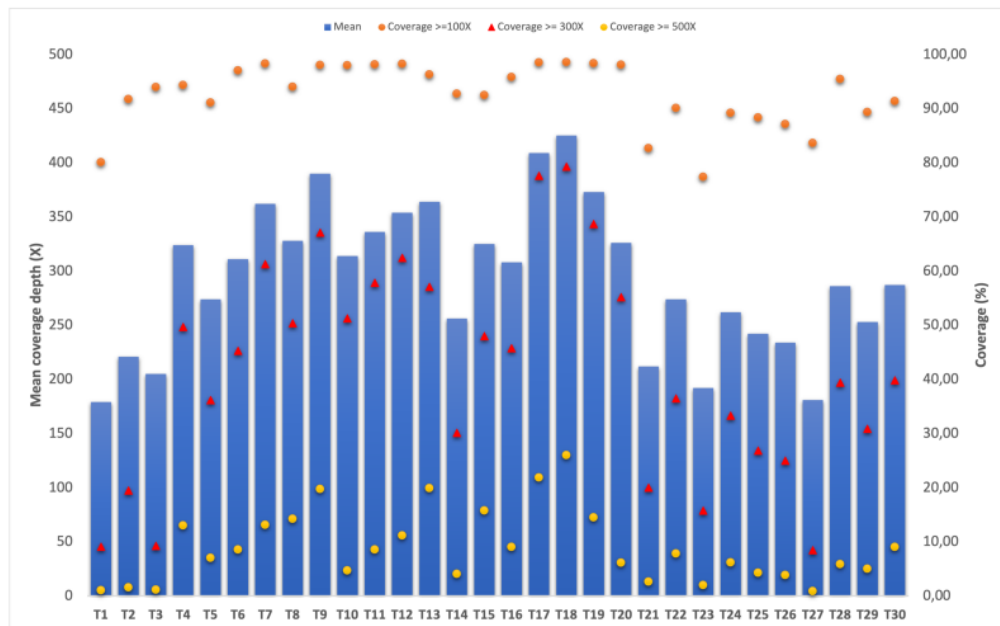

**Figure S2.** Depth and coverage of (A) HPV-associated penile squamous cell carcinoma samples (n = 30) and (B) nontumor adjacent penile tissues (n = 20).

**Table S1.** Clinical-histopathological characterization of the Latin Americans' patients with HPV-associated Penile Squamous Cell Carcinomas (n=30).

| Case. | Age | Marital status | Phymosis occurrence | Smoking | Alcoholism | HPV subtype           | Histologic type | Predominant lesion | Tu. size <sup>b</sup> | Tu. grade | Tu. stage | Lymphatic invasion | Perineural invasion |
|-------|-----|----------------|---------------------|---------|------------|-----------------------|-----------------|--------------------|-----------------------|-----------|-----------|--------------------|---------------------|
| T1    | 45  | N/A            | yes                 | N/A     | N/A        | positive <sup>a</sup> | usual           | ulcerated          | 5                     | G1        | pT2       | no                 | yes                 |
| T2    | 62  | married        | no                  | N/A     | N/A        | 16                    | usual           | ulcerated          | 2.5                   | G2        | pT3       | yes                | yes                 |
| T3    | 80  | married        | N/A                 | yes     | N/A        | 16                    | condilomatous   | ulcerated          | 10                    | G2        | pT2       | no                 | no                  |
| T4    | 80  | single         | yes                 | yes     | yes        | 16                    | usual           | ulcerated          | 1.3                   | G2        | pT1       | no                 | no                  |

|     |     |         |     |     |     |                       |                    |                   |     |    |      |     |     |
|-----|-----|---------|-----|-----|-----|-----------------------|--------------------|-------------------|-----|----|------|-----|-----|
| T5  | 81  | married | yes | yes | N/A | 18,53                 | condilomatous      | ulcerated         | 2.1 | G2 | pT1  | no  | no  |
| T6  | 76  | N/A     | yes | N/A | N/A | 30                    | usual              | ulcerated         | 10  | G2 | PT3  | yes | yes |
| T7  | 37  | married | yes | no  | yes | positive <sup>a</sup> | usual              | nodular ulcerated | 5.0 | G3 | pT3  | no  | yes |
| T8  | 54  | married | yes | yes | yes | positive <sup>a</sup> | usual              | vegetative        | 0.8 | G2 | pT2  | yes | no  |
| T9  | 78  | married | N/A | yes | yes | 16,06                 | usual and basaloid | vegetative        | 4   | G3 | pT1b | no  | no  |
| T10 | 52  | married | yes | no  | no  | 16                    | usual              | ulcerated         | 1.2 | G2 | pT1  | no  | no  |
| T11 | 85  | single  | no  | N/A | N/A | 16                    | condilomatous      | nodular ulcerated | 4   | G3 | pT3  | no  | yes |
| T12 | 83  | married | no  | yes | yes | 16                    | usual              | ulcerated         | 4.5 | G3 | pT3  | no  | yes |
| T13 | 51  | married | yes | no  | no  | 16                    | basaloid           | vegetative        | N/A | G2 | pT2  | N/A | N/A |
| T14 | 40  | married | no  | no  | no  | 59,66                 | condilomatous      | ulcer-vegetative  | 3   | G2 | pT2  | no  | no  |
| T15 | 43  | single  | yes | yes | yes | 16                    | usual              | ulcerated         | 9   | G3 | pT3  | no  | yes |
| T16 | 68  | married | N/A | no  | no  | 16,66                 | condilomatous      | verrucous         | 5.5 | G1 | pT3  | no  | no  |
| T17 | 41  | married | yes | yes | yes | 56                    | condilomatous      | vegetative        | 3.5 | G2 | pT2  | no  | no  |
| T18 | 65  | married | yes | yes | no  | 16                    | usual and basaloid | nodular ulcerated | N/A | G3 | pT3  | N/A | N/A |
| T19 | 34  | single  | yes | no  | yes | 56                    | basaloid           | ulcer-vegetative  | 6   | G2 | pT3  | no  | no  |
| T20 | 74  | married | no  | yes | yes | 11,35,59              | condilomatous      | vegetative        | 9   | G2 | pT3  | no  | no  |
| T21 | 65  | married | N/A | N/A | N/A | 16,74                 | condilomatous      | vegetative        | 3.5 | G2 | pT2  | no  | no  |
| T22 | 43  | married | no  | no  | no  | 16                    | condilomatous      | vegetative        | 2.5 | G2 | pT2  | no  | no  |
| T23 | 51  | single  | N/A | yes | yes | 16,35,59              | usual              | ulcer-vegetative  | 3   | G2 | pT2  | yes | no  |
| T24 | 64  | married | no  | yes | no  | 16                    | condilomatous      | vegetative        | 6   | G1 | pT2  | yes | yes |
| T25 | 31  | single  | yes | no  | N/A | 16                    | condilomatous      | vegetative        | 5.5 | G3 | pT3  | no  | no  |
| T26 | 71  | married | no  | no  | no  | 16                    | usual              | ulcerated         | 3.2 | G2 | pT3  | no  | no  |
| T27 | 73  | married | yes | yes | no  | 16                    | usual              | ulcerated         | N/A | G2 | pt1  | N/A | N/A |
| T28 | 67  | married | N/A | no  | no  | 16                    | condilomatous      | vegetative        | 7   | G2 | pT2  | no  | no  |
| T29 | 59  | single  | yes | no  | yes | positive <sup>a</sup> | condilomatous      | verrucous         | 5.5 | G2 | pT3  | no  | yes |
| T30 | N/A | N/A     | no  | N/A | N/A | positive <sup>a</sup> | condilomatous      | N/A               | 2.5 | G2 | N/A  | no  | no  |

PSCC: Penile Squamous Cell Carcinoma; <sup>a</sup> no information on HPV genotype; <sup>b</sup> Tu = tumor (mm); N/A = not available.

**Table S2.** Quality control of the whole-exome sequencing performed in 30 HPV-associated Penile Squamous Cell Carcinomas.

| Sample        | Paired-reads (million) | Paired-reads on-target (million) | DNA mapping (%) | Read Depth | Coverage $\geq 100X$ | Q30    |
|---------------|------------------------|----------------------------------|-----------------|------------|----------------------|--------|
| Tumor tissues |                        |                                  |                 |            |                      |        |
| T1            | 47.10                  | 46.83                            | 99.42           | 179        | 80.10                | 96.52% |
| T2            | 57.30                  | 57.20                            | 99.83           | 221        | 91.75                | 96.98% |
| T3            | 51.80                  | 51.63                            | 99.66           | 205        | 93.93                | 97.03% |
| T4            | 85.30                  | 85.03                            | 99.68           | 324        | 94.34                | 97.51% |
| T5            | 67.00                  | 66.82                            | 99.73           | 274        | 91.07                | 97.52% |
| T6            | 76.30                  | 76.19                            | 99.85           | 311        | 97.04                | 96.72% |
| T7            | 94.00                  | 93.84                            | 99.83           | 362        | 98.29                | 97.43% |
| T8            | 83.30                  | 83.04                            | 99.69           | 328        | 93.99                | 97.44% |
| T9            | 98.30                  | 98.21                            | 99.91           | 390        | 98.03                | 97.48% |
| T10           | 78.20                  | 78.06                            | 99.82           | 314        | 97.99                | 97.23% |
| T11           | 84.80                  | 84.58                            | 99.74           | 336        | 98.12                | 97.55% |
| T12           | 86.20                  | 86.12                            | 99.90           | 354        | 98.25                | 97.40% |
| T13           | 87.30                  | 87.16                            | 99.84           | 364        | 96.29                | 97.05% |

|                   |        |        |       |        |       |        |
|-------------------|--------|--------|-------|--------|-------|--------|
| T14               | 62.50  | 62.29  | 99.67 | 256    | 92.73 | 97.47% |
| T15               | 83.80  | 83.59  | 99.75 | 325    | 92.46 | 94.89% |
| T16               | 75.80  | 75.57  | 99.70 | 308    | 95.83 | 96.67% |
| T17               | 106.30 | 105.19 | 98.95 | 409    | 98.53 | 97.10% |
| T18               | 107.80 | 107.44 | 99.66 | 425    | 98.57 | 96.56% |
| T19               | 92.90  | 92.75  | 99.84 | 373    | 98.37 | 96.78% |
| T20               | 82.80  | 82.51  | 99.65 | 326    | 98.07 | 96.88% |
| T21               | 53.10  | 52.87  | 99.57 | 212    | 82.68 | 96.39% |
| T22               | 68.60  | 68.34  | 99.63 | 274    | 90.07 | 96.63% |
| T23               | 46.70  | 46.41  | 99.39 | 192    | 77.39 | 97.31% |
| T24               | 65.10  | 64.85  | 99.61 | 262    | 89.20 | 96.90% |
| T25               | 60.60  | 60.51  | 99.85 | 242    | 88.32 | 96.71% |
| T26               | 59.20  | 58.99  | 99.65 | 234    | 87.11 | 97.63% |
| T27               | 43.10  | 42.85  | 99.42 | 181    | 83.64 | 97.52% |
| T28               | 69.60  | 69.45  | 99.78 | 286    | 95.45 | 97.13% |
| T29               | 64.80  | 64.63  | 99.73 | 253    | 89.36 | 96.96% |
| T30               | 73.80  | 73.62  | 99.75 | 287    | 91.37 | 97.02% |
| Mean              | 73.78  | 73.55  | 99.68 | 293.5  | 92.61 | 97.01% |
| SD                | 17.43  | 17.38  | 0.19  | 67.8   | 5.85  | 0.53   |
| Non-tumor tissues |        |        |       |        |       |        |
| NT2               | 111.8  | 111.39 | 99.63 | 441    | 99.44 | 97.85% |
| NT3               | 69.7   | 69.33  | 99.46 | 270    | 98.52 | 96.63% |
| NT6               | 83.1   | 83.03  | 99.92 | 328    | 99.12 | 97.43% |
| NT8               | 34.2   | 34.09  | 99.68 | 140    | 65.09 | 97.25% |
| NT10              | 79.9   | 79.77  | 99.84 | 301    | 98.94 | 97.30% |
| NT11              | 73.5   | 73.36  | 99.81 | 292    | 98.87 | 97.27% |
| NT12              | 85.5   | 85.31  | 99.78 | 348    | 99.22 | 96.96% |
| NT13              | 94.7   | 94.52  | 99.81 | 369    | 99.34 | 96.83% |
| NT14              | 63.5   | 63.31  | 99.71 | 265    | 94.11 | 97.68% |
| NT15              | 54.7   | 54.48  | 99.59 | 219    | 93.09 | 96.46% |
| NT17              | 71.5   | 71.44  | 99.91 | 300    | 96.97 | 95.02% |
| NT18              | 91.9   | 91.74  | 99.83 | 356    | 99.28 | 96.81% |
| NT19              | 98.2   | 97.55  | 99.34 | 383    | 99.33 | 96.23% |
| NT20              | 95.8   | 95.62  | 99.81 | 389    | 98.86 | 95.52% |
| NT21              | 75.7   | 75.44  | 99.66 | 292    | 98.85 | 96.42% |
| NT22              | 59.3   | 59.00  | 99.49 | 233    | 85.77 | 96.10% |
| NT23              | 59.7   | 59.45  | 99.58 | 240    | 88.03 | 96.34% |
| NT24              | 80.7   | 80.37  | 99.59 | 333    | 94.59 | 96.22% |
| NT25              | 60.3   | 60.10  | 99.67 | 235    | 88.20 | 96.77% |
| NT28              | 63.4   | 63.06  | 99.47 | 265    | 92.81 | 96.05% |
| Mean              | 75.36  | 75.12  | 99.68 | 299.95 | 94.42 | 96.65  |
| SD                | 18.23  | 18.18  | 0.16  | 70.60  | 8.15  | 0.71   |

**Table 3.** Cancer-associated genes presenting alterations in HPV-associated Penile Squamous Cell Carcinomas from Latin Americans.

| Genes          |                |                |                |               |                |
|----------------|----------------|----------------|----------------|---------------|----------------|
| <i>ABL2</i>    | <i>CDH17</i>   | <i>ELF3</i>    | <i>KMT2D</i>   | <i>NUTM2A</i> | <i>SF3B1</i>   |
| <i>AKT1</i>    | <i>CDKN2A</i>  | <i>ELF4</i>    | <i>KRAS</i>    | <i>OLIG2</i>  | <i>SFRP4</i>   |
| <i>ANK1</i>    | <i>CDX2</i>    | <i>EPHA7</i>   | <i>LCP1</i>    | <i>PBRM1</i>  | <i>SH2B3</i>   |
| <i>ARHGAP5</i> | <i>CEBPA</i>   | <i>ERBB2</i>   | <i>LMO2</i>    | <i>PCM1</i>   | <i>SKI</i>     |
| <i>ARID1B</i>  | <i>CIC</i>     | <i>ERBB4</i>   | <i>LRP1B</i>   | <i>PDGFRA</i> | <i>SLC34A2</i> |
| <i>ARID2</i>   | <i>CLTC</i>    | <i>ETV1</i>    | <i>MACC1</i>   | <i>PICALM</i> | <i>SMARCA4</i> |
| <i>ATM</i>     | <i>CLTCL1</i>  | <i>ETV6</i>    | <i>MAP2K1</i>  | <i>PIK3CA</i> | <i>SOS1</i>    |
| <i>BAP1</i>    | <i>CNBD1</i>   | <i>EZR</i>     | <i>MAP3K13</i> | <i>POLE</i>   | <i>SPECC1</i>  |
| <i>BCL11B</i>  | <i>CNTNAP2</i> | <i>FAM135B</i> | <i>MAX</i>     | <i>POLG</i>   | <i>SPEN</i>    |
| <i>BCL3</i>    | <i>COL1A1</i>  | <i>FAM47C</i>  | <i>MDM2</i>    | <i>POLQ</i>   | <i>TBX3</i>    |
| <i>BCL6</i>    | <i>COL2A1</i>  | <i>FAT1</i>    | <i>MPL</i>     | <i>PRCC</i>   | <i>TLX3</i>    |
| <i>BCL7A</i>   | <i>CREB3L2</i> | <i>FAT3</i>    | <i>MSN</i>     | <i>PREX2</i>  | <i>TOP1</i>    |

|                |               |                  |               |               |                |
|----------------|---------------|------------------|---------------|---------------|----------------|
| <i>BCL9</i>    | <i>CRELD2</i> | <i>FBLN2</i>     | <i>MTOR</i>   | <i>PRKCB</i>  | <i>TP53</i>    |
| <i>BCL9L</i>   | <i>CRTC3</i>  | <i>FBXW7</i>     | <i>MUC16</i>  | <i>PTCH1</i>  | <i>TP63</i>    |
| <i>BCR</i>     | <i>CSF1R</i>  | <i>FES</i>       | <i>MYCN</i>   | <i>PTPN6</i>  | <i>TRRAP</i>   |
| <i>BIRC6</i>   | <i>CSMD3</i>  | <i>FGFR3</i>     | <i>MYH9</i>   | <i>PTPRB</i>  | <i>TSC2</i>    |
| <i>BRAF</i>    | <i>CTCF</i>   | <i>FLI1</i>      | <i>MYOD1</i>  | <i>PTPRC</i>  | <i>TUB</i>     |
| <i>BRCA1</i>   | <i>CTNNB1</i> | <i>FLT4</i>      | <i>NBEA</i>   | <i>PTPRD</i>  | <i>UBXN11</i>  |
| <i>BRCA2</i>   | <i>CTNND2</i> | <i>FUS</i>       | <i>NCOA1</i>  | <i>PTPRT</i>  | <i>WNT8B</i>   |
| <i>BRD3</i>    | <i>CUX1</i>   | <i>GNAS</i>      | <i>NCOA2</i>  | <i>RB1</i>    | <i>ZEB1</i>    |
| <i>BRD4</i>    | <i>CYLD</i>   | <i>GPC5</i>      | <i>NCOA4</i>  | <i>RBM39</i>  | <i>ZNF479</i>  |
| <i>CACNA1D</i> | <i>DCC</i>    | <i>HERPUD1</i>   | <i>NCOR2</i>  | <i>RGPD3</i>  |                |
| <i>CARD11</i>  | <i>DDR2</i>   | <i>HNRNPA2B1</i> | <i>NF1</i>    | <i>RHPN2</i>  |                |
| <i>CASP8</i>   | <i>DDX5</i>   | <i>HOOK3</i>     | <i>NFE2L2</i> | <i>RNF213</i> |                |
| <i>CBL</i>     | <i>DDX6</i>   | <i>ISX</i>       | <i>NONO</i>   | <i>RPL22</i>  |                |
| <i>CBLB</i>    | <i>DNM2</i>   | <i>JAK3</i>      | <i>NOTCH1</i> | <i>RSPO3</i>  |                |
| <i>CBLC</i>    | <i>DNMT3A</i> | <i>KDM6A</i>     | <i>NOTCH2</i> | <i>RUNX1</i>  |                |
| <i>CCND3</i>   | <i>DROSHA</i> | <i>KDR</i>       | <i>NT5C2</i>  |               | <i>RUNX1T1</i> |
| <i>CD79A</i>   | <i>ECT2L</i>  | <i>KIAA1549</i>  | <i>NTRK3</i>  | <i>SETBP1</i> |                |
| <i>CDC73</i>   | <i>EGFR</i>   | <i>KMT2C</i>     | <i>NUP214</i> | <i>SETD1B</i> |                |

**Table 4.** Top 84 genes with somatic variants identified by WES in HPV-associated Penile Squamous Cell Carcinomas from Latin Americans, and the normalized number of variants based on gene size (bp). Cancer-associated genes are highlighted in bold.

| Gene            | Number of Tumors (%) | Number of variants | Gene size (bp) | Normalized number of variants (1000bp) |
|-----------------|----------------------|--------------------|----------------|----------------------------------------|
| <b>NOTCH1</b>   | 10 (50)              | 10                 | 13902          | 0.72                                   |
| <i>TTN</i>      | 9 (45)               | 13                 | 169889         | 0.08                                   |
| <i>TERT</i>     | 9 (45)               | 10                 | 7064           | 1.42                                   |
| <b>FAT1</b>     | 9 (45)               | 10                 | 18810          | 0.53                                   |
| <b>TP53</b>     | 8 (40)               | 8                  | 3097           | 2.58                                   |
| <b>CDKN2A</b>   | 7 (35)               | 7                  | 1912           | 3.66                                   |
| <i>RYR2</i>     | 6 (30)               | 7                  | 35904          | 0.19                                   |
| <i>LRP1</i>     | 6 (30)               | 6                  | 29302          | 0.20                                   |
| <i>HMCN2</i>    | 5 (25)               | 8                  | 33970          | 0.24                                   |
| <b>FBXW7</b>    | 5 (25)               | 6                  | 5162           | 1.16                                   |
| <b>CASP8</b>    | 5 (25)               | 6                  | 3634           | 1.65                                   |
| <i>MUC19</i>    | 5 (25)               | 5                  | 56064          | 0.09                                   |
| <i>ITGA8</i>    | 5 (25)               | 5                  | 9192           | 0.54                                   |
| <i>ABI3BP</i>   | 5 (25)               | 5                  | 18352          | 0.27                                   |
| <i>USH2A</i>    | 4 (20)               | 5                  | 29750          | 0.17                                   |
| <i>TRPM2</i>    | 4 (20)               | 4                  | 11262          | 0.36                                   |
| <b>SMARCA4</b>  | 4 (20)               | 4                  | 11901          | 0.34                                   |
| <b>PTPRB</b>    | 4 (20)               | 4                  | 13497          | 0.30                                   |
| <i>PCLO</i>     | 4 (20)               | 4                  | 20446          | 0.20                                   |
| <i>MYO15A</i>   | 4 (20)               | 4                  | 22443          | 0.18                                   |
| <b>KMT2C</b>    | 4 (20)               | 4                  | 26273          | 0.15                                   |
| <b>CR1</b>      | 4 (20)               | 4                  | 16322          | 0.25                                   |
| <i>CTNND2</i>   | 4 (20)               | 4                  | 8078           | 0.50                                   |
| <i>CASKIN1</i>  | 4 (20)               | 4                  | 7259           | 0.55                                   |
| <b>AJUBA</b>    | 4 (20)               | 4                  | 3330           | 1.20                                   |
| <b>KMT2D</b>    | 3 (15)               | 6                  | 25008          | 0.24                                   |
| <i>RYR3</i>     | 3 (15)               | 5                  | 35274          | 0.14                                   |
| <i>EPPK1</i>    | 3 (15)               | 5                  | 15467          | 0.32                                   |
| <i>CCDC168</i>  | 3 (15)               | 5                  | 21861          | 0.23                                   |
| <i>XIRP2</i>    | 3 (15)               | 4                  | 14495          | 0.28                                   |
| <i>VPS41</i>    | 3 (15)               | 4                  | 8212           | 0.49                                   |
| <i>SYNE1</i>    | 3 (15)               | 4                  | 55897          | 0.07                                   |
| <i>TMEM132C</i> | 3 (15)               | 4                  | 5127           | 0.78                                   |

|                 |        |   |       |      |
|-----------------|--------|---|-------|------|
| <i>PPP2R3A</i>  | 3 (15) | 4 | 6385  | 0.63 |
| <i>OBSCN</i>    | 3 (15) | 4 | 49934 | 0.08 |
| <i>KRT6A</i>    | 3 (15) | 4 | 3290  | 1.22 |
| <i>CAPN9</i>    | 3 (15) | 4 | 6036  | 0.66 |
| <i>ZAN</i>      | 3 (15) | 3 | 17257 | 0.17 |
| <i>ZNF831</i>   | 3 (15) | 3 | 6034  | 0.50 |
| <i>ZZEF1</i>    | 3 (15) | 3 | 19541 | 0.15 |
| <i>SSPOP</i>    | 3 (15) | 3 | 32660 | 0.09 |
| <i>THSD7A</i>   | 3 (15) | 3 | 10574 | 0.28 |
| <i>SEL1L2</i>   | 3 (15) | 3 | 5219  | 0.57 |
| <i>SEMA6D</i>   | 3 (15) | 3 | 6383  | 0.47 |
| <i>TFAP2A</i>   | 3 (15) | 3 | 3174  | 0.95 |
| <i>RRP12</i>    | 3 (15) | 3 | 10206 | 0.29 |
| <i>PKHD1</i>    | 3 (15) | 3 | 25561 | 0.12 |
| <i>PLCE1</i>    | 3 (15) | 3 | 13366 | 0.22 |
| <i>RTN1</i>     | 3 (15) | 3 | 4280  | 0.70 |
| <i>PRDM9</i>    | 3 (15) | 3 | 4685  | 0.64 |
| <b>MTOR</b>     | 3 (15) | 3 | 18766 | 0.16 |
| <i>NEB</i>      | 3 (15) | 3 | 59824 | 0.05 |
| <i>MCF2L</i>    | 3 (15) | 3 | 10014 | 0.30 |
| <i>MROH2A</i>   | 3 (15) | 3 | 13000 | 0.23 |
| <i>PADI1</i>    | 3 (15) | 3 | 5046  | 0.59 |
| <i>MUC5AC</i>   | 3 (15) | 3 | 25566 | 0.12 |
| <b>NBEA</b>     | 3 (15) | 3 | 20327 | 0.15 |
| <i>LLGL1</i>    | 3 (15) | 3 | 6773  | 0.44 |
| <b>LRP1B</b>    | 3 (15) | 3 | 31847 | 0.09 |
| <i>HUWE1</i>    | 3 (15) | 3 | 28721 | 0.10 |
| <i>HCN1</i>     | 3 (15) | 3 | 4273  | 0.70 |
| <i>GUCY2D</i>   | 3 (15) | 3 | 6408  | 0.47 |
| <i>FRAS1</i>    | 3 (15) | 3 | 26897 | 0.11 |
| <b>FAM135B</b>  | 3 (15) | 3 | 8021  | 0.37 |
| <i>GFPT2</i>    | 3 (15) | 3 | 5750  | 0.52 |
| <b>GTF2I</b>    | 3 (15) | 3 | 9554  | 0.31 |
| <b>CIC</b>      | 3 (15) | 3 | 10499 | 0.29 |
| <i>CHD5</i>     | 3 (15) | 3 | 13467 | 0.22 |
| <i>CEP162</i>   | 3 (15) | 3 | 9412  | 0.32 |
| <i>CSMD2</i>    | 3 (15) | 3 | 25423 | 0.12 |
| <i>DMXL2</i>    | 3 (15) | 3 | 17510 | 0.17 |
| <i>CNTNAP5</i>  | 3 (15) | 3 | 8698  | 0.34 |
| <i>DNAH11</i>   | 3 (15) | 3 | 29500 | 0.10 |
| <i>COL11A1</i>  | 3 (15) | 3 | 18494 | 0.16 |
| <i>COL6A1</i>   | 3 (15) | 3 | 9304  | 0.32 |
| <i>ARHGEF15</i> | 3 (15) | 3 | 4801  | 0.62 |
| <i>ADAMTS12</i> | 3 (15) | 3 | 9650  | 0.31 |
| <i>ARHGAP31</i> | 3 (15) | 3 | 6735  | 0.45 |
| <i>ADGRV1</i>   | 3 (15) | 3 | 36634 | 0.08 |
| <i>ATP10A</i>   | 3 (15) | 3 | 8419  | 0.36 |
| <i>AFF2</i>     | 3 (15) | 3 | 8387  | 0.36 |
| <i>CACNA1C</i>  | 3 (15) | 3 | 17453 | 0.17 |
| <i>ANK2</i>     | 3 (15) | 3 | 23304 | 0.13 |
| <i>APOB</i>     | 3 (15) | 3 | 19221 | 0.16 |

---

**Table S5.** Variants detected in the most altered genes in Latin Americans with HPV-associated Penile Squamous Cell Carcinomas.

| Gene          | HGVS id        | Variants found in COSMIC Database | dbSNP        | Variants not found in COSMIC Database | dbSNP        |
|---------------|----------------|-----------------------------------|--------------|---------------------------------------|--------------|
| <i>NOTCH1</i> | NM_017617.5    | c.1172C>T                         | -            | c.1445A>C                             | -            |
|               |                | c.4015-6G>A                       | -            | c.4389C>A                             | -            |
|               |                | c.1270G>A                         | rs1341448592 | c.5613C>A                             | -            |
|               |                | c.1379C>T                         | rs776258761  | c.3184_3185insTGTGCACT                | -            |
|               |                |                                   |              | c.3439G>A                             | rs1589060737 |
| <i>FAT1</i>   | NM_005245.4    |                                   |              | c.76C>T                               | rs1217905346 |
|               |                | c.2173C>T                         | -            | c.3643-2A>G                           | -            |
|               |                | c.7789C>T                         | rs777631605  | c.1550dupG                            | -            |
|               |                |                                   |              | c.10377delG                           | -            |
|               |                |                                   |              | c.4183+1G>C                           | -            |
|               |                |                                   |              | c.10830_10836del                      | -            |
|               |                |                                   |              | c.859_866del                          | -            |
|               |                |                                   |              | c.2879G>C                             | -            |
|               |                |                                   |              | c.5029delA                            | -            |
| <i>TTN</i>    | NM_001267550.2 | c.77902G>A                        | rs756933390  | c.21961+1G>A                          | -            |
|               |                |                                   |              | c.43498C>T                            | -            |
|               |                |                                   |              | c.107581G>A                           | -            |
|               |                |                                   |              | c.21115+6T>G                          | -            |
|               |                |                                   |              | c.94913C>A                            | -            |
|               |                |                                   |              | c.25230T>G                            | -            |
|               |                |                                   |              | c.23076C>A                            | -            |
|               |                |                                   |              | c.44929G>T                            | -            |
|               |                |                                   |              | c.25622C>T                            | -            |
|               |                |                                   |              | TTN:chr2:g.178652606G>C               | -            |
|               |                |                                   |              | c.72331G>C                            | rs369671334  |
|               |                |                                   |              | c.45408G>T                            | rs72677225   |
| <i>TP53</i>   | NM_000546.6    | c.529_546del                      | -            |                                       |              |
|               |                | c.832_833delinsTT                 | -            |                                       |              |
|               |                | c.722C>T                          | rs28934573   |                                       |              |
|               |                | c.615T>A                          | rs786202222  |                                       |              |
|               |                | c.743G>A                          | rs11540652   |                                       |              |
|               |                | c.375+5G>A                        | rs1555526466 |                                       |              |
|               |                | c.832C>T                          | rs17849781   |                                       |              |
|               |                | c.574C>T                          | rs866380588  |                                       |              |
|               |                | **c.733G>T                        | -            |                                       |              |
| <i>CDKN2A</i> | NM_000077.5    | **c.817C>T                        | -            |                                       |              |
|               |                | **c.818G>T                        | rs28934576   |                                       |              |
|               |                | c.330G>A                          | rs121913389  |                                       |              |
|               |                | c.238C>T                          | rs121913388  |                                       |              |
|               |                | c.172C>T                          | rs121913387  |                                       |              |
| <i>RYR2</i>   | NM_000077.5    | c.329G>A                          | rs1057519852 |                                       |              |
|               |                | c.4990G>A                         | rs749434532  | c.11240G>C                            | -            |
|               |                |                                   |              | c.1572G>T                             | -            |
|               |                |                                   |              | c.10904_10916del                      | -            |
|               |                |                                   |              | c.4978C>T                             | -            |
|               |                |                                   |              | c.1613-3C>A                           | -            |
|               |                |                                   |              | c.7643T>A                             | -            |
| <i>CASP8</i>  | NM_001228.4    |                                   |              | **RYR3:chr15:g.33581455AC>GT          | -            |
|               |                |                                   |              | c.621C>G                              | -            |
|               |                |                                   |              | c.1170dupT                            | -            |
|               |                |                                   |              | c.948delC                             | -            |
|               |                |                                   |              | c.541A>G                              | -            |
|               |                |                                   |              | c.1321T>C                             | -            |

|          |               |            |             |                                  |              |
|----------|---------------|------------|-------------|----------------------------------|--------------|
|          |               |            |             | c.1276_1277del                   | rs587776665  |
|          |               |            |             | **c.202C>T                       | rs777784105  |
|          |               |            |             | c.607T>C                         | -            |
|          | N             |            |             | c.1273A>G                        | -            |
|          | M_001013415.2 |            |             | c.1081_1082insA                  | -            |
| FBXW7    |               |            |             | FBXW7:chr4:g.152328394AAA>:p.?   | -            |
|          |               |            |             | c.1159C>A                        | rs149680468  |
|          |               |            |             | **c.1082G>A                      | rs866987936  |
|          |               |            |             | c.8947G>A                        | -            |
|          | NM_001291815. |            |             | c.14834G>A                       | -            |
|          | 2             |            |             | c.5678-8C>T                      | -            |
| HMCN2    |               |            |             | HMCN2:chr9:g.130349742G>A        | -            |
|          |               |            |             | c.2920+17C>T                     | rs1033947767 |
|          |               |            |             | c.1798G>A                        | rs1363437156 |
|          |               |            |             | c.13840G>A                       | rs779508163  |
|          |               |            |             | c.2350C>T                        | rs564316104  |
|          | NM_003638.3   | c.2818G>A  | rs369955410 | c.2478+12C>G                     | -            |
| ITGA8    |               |            |             | c.2672G>A                        | -            |
|          |               |            |             | c.652G>A                         | rs139218863  |
|          |               |            |             | c.209+11C>T                      | rs771423381  |
|          | NM_000651.6   | c.5383G>T  | -           | c.4067G>C                        | -            |
| *CR1     |               |            |             | CR1:chr1:g.207588649A>T          | -            |
|          |               |            |             | c.68G>A                          | -            |
|          |               |            |             | **CR1:chr1:g.207618037C>G        | -            |
|          | NM_206933.4   | c.5329C>T  | rs770329105 | c.5168-19C>A                     | -            |
| USH2A    |               | c.3221G>T  | -           | c.6743A>G                        | -            |
|          |               |            |             | c.272G>T                         | -            |
|          | NM_014510.3   | c.4150G>A  | -           | c.13171C>A                       | -            |
| PCLO     |               | c.4090G>A  | -           | c.14174A>G                       | rs768440811  |
|          | NM_003307.4   |            |             | c.1677C>G                        | -            |
| TRPM2    |               |            |             | c.1391G>A                        | rs762016604  |
|          |               |            |             | c.2882G>A                        | rs752512943  |
|          |               |            |             | TRPM2:chr21:g.44382683C>T        | rs1408103898 |
|          | NM_001128849. | c.3575G>A  | -           | SMARCA4:chr19:g.11003471C>T      | rs539548654  |
| *SMARCA4 | 3             |            |             | **c.3573C>A                      | -            |
|          |               | c.1249C>T  | -           |                                  |              |
|          |               | c.3694G>A  | -           |                                  |              |
|          | NM_170606.3   | c.2872G>C  | rs758966724 | c.11261C>T                       | -            |
| *KMT2C   |               |            |             | c.4844G>A                        | -            |
|          |               |            |             | c.9059C>G                        | -            |
|          |               |            |             | c.162-17T>G                      | rs187902675  |
|          | NM_032876.6   |            |             | c.1006G>C                        | -            |
| *AJUBA   |               |            |             | c.762_763insGA                   | -            |
|          |               |            |             | c.445dupG                        | -            |
|          |               |            |             | AJUBA:chr14:g.22978448GAGAA>:p.? | rs755876832  |
|          | NM_001109754. |            |             | c.979G>C                         | -            |
| *PTPRB   | 4             |            |             | c.2357C>G                        | -            |
|          |               |            |             | PTPRB:chr12:g.70609388C>T        | -            |
|          |               |            |             | c.2886G>C                        | rs1282856643 |
|          | NM_003482.4   | c.511C>T   | rs770105193 | c.9614G>C                        | -            |
| *KMT2D   |               | c.12133C>T | -           | c.9232G>C                        | -            |
|          |               |            |             | c.9186G>C                        | -            |
|          |               |            |             | c.8914G>A                        | -            |
|          | NM_031308.4   |            |             | c.6566C>A                        | -            |
| EPPK1    |               |            |             | c.2843A>G                        | -            |



|          |                |                  |              |                               |              |
|----------|----------------|------------------|--------------|-------------------------------|--------------|
|          |                |                  |              | c.13964G>A                    | rs1486151503 |
|          |                |                  |              | c.3355G>A                     | rs200211342  |
|          |                |                  |              | c.2558G>A                     | rs182198840  |
| CCDC168  | NM_001146197.3 |                  |              | c.12737C>A                    | -            |
|          |                |                  |              | c.11379G>T                    | -            |
|          |                |                  |              | c.11043G>C                    | -            |
|          |                |                  |              | c.1718G>A                     | rs1298360300 |
|          |                |                  |              | c.13597C>T                    | rs765904390  |
| XIRP2    | NM_152381.6    | c.8730C>A        | -            | c.5210C>T                     | -            |
|          |                |                  |              | c.1281G>C                     | -            |
|          |                |                  |              | c.6911C>A                     | rs759805308  |
| TMEM132C | NM_001136103.3 | c.950C>T         | -            | TMEM132C:chr12:g.128543908G>A |              |
|          |                | c.2665C>T        | -            |                               |              |
|          |                | c.218G>A         | rs545431831  |                               |              |
| ZAN      | NM_173059.3    | c.236G>A         | rs759815650  | c.5081C>G                     | -            |
|          |                |                  |              | c.5405G>C                     | -            |
| THSD7A   | NM_015204.3    | c.890G>A         | rs750574911  | c.3605G>A                     | -            |
|          |                |                  |              | c.389A>G                      | rs182889564  |
| TFAP2A   | NM_001032280.3 |                  |              | c.50_60del                    | -            |
|          |                |                  |              | c.861dupA                     | -            |
|          |                |                  |              | c.158C>T                      | -            |
| *NBEA    | NM_015678.5    | c.6226C>T        | rs937383651  | c.6060G>A                     | -            |
|          |                |                  |              | c.1572T>G                     | -            |
| HCN1     | NM_021072.4    | c.145G>A         | rs1214766208 | **c.46C>                      | -            |
|          |                |                  |              | c.134G>T                      | -            |
| HUWE1    | NM_031407.7    | c.12610_12612del | -            | c.99_147del                   | -            |
|          |                | c.9274G>A        | -            | c.12448G>A                    | -            |
| *GTF2I   | NM_031407.7    |                  |              | c.178G>C                      | -            |
|          |                |                  |              | c.20C>G                       | -            |
|          |                |                  |              | c.233A>G                      | -            |
| CSMD2    | NM_052896.5    |                  |              | c.6599G>A                     | -            |
|          |                |                  |              | c.1241G>A                     | -            |
|          |                |                  |              | c.3986G>C                     | -            |
|          |                |                  |              | **c.3653A>C                   | -            |
| DMXL2    | NM_052896.5    |                  |              | **c.8609C>A                   | rs983521648  |
|          |                |                  |              | c.1228C>G                     | -            |
|          |                |                  |              | c.8972G>A                     | rs1457497323 |
|          |                |                  |              | c.2980A>T                     | rs1402444713 |
| APOB     | NM_000384.3    | c.4928C>T        | rs1008238083 | c.10813A>G                    | -            |
|          |                |                  |              | c.11711A>T                    | rs1216474211 |
|          |                |                  |              | **c.8359G>T                   | -            |
| CACNA1C  | NM_000719.7    | c.1049C>T        | -            | c.4184G>T                     | -            |
|          |                |                  |              | c.2579G>A                     | rs730880056  |
| CAPN9    | NM_006615.3    | c.574G>A         | rs536743386  | CAPN9:chr1:g.230767487CA>TG   |              |
|          |                | c.430G>A         | rs373142698  | c.985G>A                      | rs386640213  |
| TERT     | NM_198253.3    |                  |              | c.2713G>A                     | -            |
|          |                |                  |              | TERT:upstream                 | rs1561215364 |
|          |                |                  |              | TERT:upstream                 | rs1242535815 |
| LRP1     | NM_002332.3    | c.4945G>A        | rs756702192  | c.7237-6C>G                   | -            |
|          |                |                  |              | c.9313G>A                     | -            |
|          |                |                  |              | c.-60del-                     | -            |
|          |                |                  |              | c.10595-1G>C                  | -            |
| MUC19    | NM_173600.2    |                  |              | LRP1:chr12:g.57179305C>T      | -            |
|          |                |                  |              | c.3521-3C>T                   | -            |
|          |                |                  |              | MUC19:chr12:g.40517996C>A     | -            |

|          |                    |               |              |                                                                |                   |
|----------|--------------------|---------------|--------------|----------------------------------------------------------------|-------------------|
|          |                    |               |              | MUC19:chr12:g.40526387G>A<br>c.23026+3G>A                      | -<br>rs571099944  |
|          |                    |               |              | MUC19:chr12:g.40518774A>G                                      | rs1192112733      |
|          | NM_001377332.<br>1 |               |              | c.2525-3C>G                                                    | -                 |
| ABI3BP   |                    |               |              | ABI3BP:upstream                                                | -                 |
|          |                    |               |              | ABI3BP:chr3:g.100862455GGTTGCT>-<br>c.1625G>A                  | -<br>rs202241381  |
|          |                    |               |              | ABI3BP:chr3:g.100811849A>C                                     | rs140918578       |
|          | NM_016239.4        |               |              | c.*32A>G                                                       | -                 |
| MYO15A   |                    |               |              | MYO15A:chr17:g.18158466G>C<br>c.1687C>T                        | -<br>rs763019528  |
|          |                    |               |              | c.2447G>A                                                      | rs1219944687      |
|          | NM_001332.4        | c.1231C>T     | rs1490647469 | c.1246C>T                                                      | -                 |
| CTNND2   |                    |               |              | CTNND2:chr5:g.11903747C>T<br>CTNND2:chr5:g.11364627G>C         | -<br>rs191668396  |
|          | NM_020764.4        |               |              | c.2011G>A<br>c.3355G>T                                         | -<br>-            |
| CASKIN1  |                    |               |              | CASKIN1:chr16:g.2178656GC>AA:p.?<br>CASKIN1:chr16:g.2190209C>T | -<br>rs528686030  |
| LRP1B    | NM_018557.3        | c.9121G>A     | -            | c.11258-1G>C<br>c.12629A>G                                     | -<br>rs1284354287 |
|          | NM_004958.4        |               |              | c.5246G>A<br>c.5156A>C                                         | -<br>-            |
| MTOR     |                    |               |              | MTOR:chr1:g.11212934G>A                                        | rs181405432       |
|          | NM_015125.5        | c.1264C>T     | -            | CIC:chr19:g.42287248CC>TT:p.?<br>CIC:chr19:g.42274618G>A       | -<br>rs1237895323 |
| *CIC     |                    |               |              | **c.2699-20T>G<br>**c.419G>A                                   | -<br>rs529183042  |
|          | NM_015912.4        | **c.3540+3A>G |              | FAM135B:chr8:g.138132825A>C<br>FAM135B:chr8:g.138251097C>T     | -<br>-            |
| *FAM135B |                    |               |              | c.2974T>A                                                      | rs374106478       |

\*: cancer-associated genes found exclusively in Latin Americans; \*\*: variants found exclusively in tumors unpaired with adjacent normal penile tissue.

Table S6. Main altered genes described in three previous studies in which whole-exome sequencing was performed in Penile Squamous Cell Carcinomas from Europeans [14], Asians [15], and North Americans [16], compared to Latin Americans (this study).

| European (n=27) |            |          | Asian (n=30) |            |          | North American (n=34) |            |          | Latin American (n=30) |            |
|-----------------|------------|----------|--------------|------------|----------|-----------------------|------------|----------|-----------------------|------------|
| Genes           | HPV status |          | Genes        | HPV status |          | Genes                 | HPV status |          | Genes                 | HPV status |
|                 | Positive   | Negative |              | Positive   | Negative |                       | Positive   | Negative |                       | Positive   |
| NBPF1           | 7          | 6        | FAT1         | 1          | 3        | NOTCH1                | 5          | 10       | NOTCH1                | 10         |
| FLG             | 1          | 3        | CASP8        | 0          | 4        | FAT1                  | 2          | 10       | TERT                  | 9          |
| XIRP2           | 1          | 2        | NOTCH1       | 0          | 4        | TP53                  | 1          | 11       | FAT1                  | 9          |
| SACS            | 1          | 1        | HRAS         | 0          | 4        | TTN                   | 2          | 9        | TTN                   | 9          |
| NUP210L         | 1          | 1        | PIK3CA       | 1          | 2        | CDKN2A                | 2          | 8        | TP53                  | 8          |
| NSD1            | 0          | 3        | TP53         | 1          | 2        | CASP8                 | 1          | 7        | CDKN2A                | 7          |
| MUC17           | 1          | 2        | FLG          | 0          | 3        | MUC4                  | 3          | 4        | LRP1                  | 6          |
| MGA             | 0          | 2        | SLITRK2      | 1          | 2        | PIK3CA                | 3          | 4        | RYR2                  | 6          |
| KIT             | 1          | 1        | CCDC168      | 0          | 3        | DNAH6                 | 2          | 4        | CASP8                 | 5          |
| IL7R            | 2          | 1        | TRRAP        | 1          | 2        | AHNAK2                | 1          | 4        | FBXW7                 | 5          |
| HRAS            | 3          | 1        | TTN          | 0          | 3        | EP300                 | 3          | 2        | ITGA8                 | 5          |
| HLA-B           | 1          | 4        |              |            |          | FBXW7                 | 0          | 5        | ABI3BP                | 5          |
| DNAH12          | 1          | 2        |              |            |          | LAMA1                 | 2          | 2        | HMCN2                 | 5          |
| ZRANB3          | 0          | 1        |              |            |          | MUC17                 | 2          | 3        | MUC19                 | 5          |
| ZNF180          | 0          | 1        |              |            |          | MUC2                  | 3          | 2        | AJUBA                 | 4          |

|          |   |   |          |   |   |          |   |
|----------|---|---|----------|---|---|----------|---|
| ZFH3     | 1 | 1 | AK302511 | 1 | 3 | CASKIN1  | 4 |
| WASF3    | 1 | 2 | ARP21    | 4 | 0 | CTNND2   | 4 |
| TXNDC8   | 0 | 2 | BIRC6    | 1 | 3 | TRPM2    | 4 |
| TSC1     | 1 | 2 | CACNA1C  | 1 | 3 | SMARCA4  | 4 |
| TNFRSF14 | 1 | 1 | CSPG4    | 3 | 1 | PTPRB    | 4 |
| TIMM17A  | 0 | 0 | FAT4     | 1 | 3 | CR1      | 4 |
| TGFB2    | 1 | 1 | FHAD1    | 2 | 2 | PCLO     | 4 |
| TET2     | 1 | 1 | FRG1     | 2 | 2 | MYO15A   | 4 |
| TDRD10   | 1 | 1 | FRY      | 3 | 1 | USH2A    | 4 |
| STK19    | 1 | 0 | FSIP2    | 2 | 2 | KMT2C    | 4 |
| SPEN     | 0 | 1 | GRIN2B   | 2 | 2 | KRT6A    | 3 |
| SNX25    | 0 | 2 | KMT2B    | 0 | 4 | TFAP2A   | 3 |
| SETDB1   | 2 | 1 | MYO18B   | 2 | 2 | TMEM132C | 3 |
| SELP     | 1 | 1 | PDE4DIP  | 2 | 2 | HCN1     | 3 |
| PRDM1    | 0 | 2 | PKD1     | 1 | 3 | RTN1     | 3 |
| OTUD7A   | 1 | 1 |          |   |   | CAPN9    | 3 |
| OR52N1   | 0 | 1 |          |   |   | PRDM9    | 3 |
| OR4A16   | 0 | 1 |          |   |   | PPP2R3A  | 3 |
| NTN4     | 1 | 1 |          |   |   | ARHGEF15 | 3 |
| NOTCH1   | 1 | 2 |          |   |   | PADI1    | 3 |
| NF1      | 1 | 2 |          |   |   | SEL1L2   | 3 |
| NCOR1    | 0 | 2 |          |   |   | GFPT2    | 3 |
| MYOCD    | 0 | 1 |          |   |   | ZNF831   | 3 |
| MORC4    | 0 | 1 |          |   |   | VPS41    | 3 |
| MLL3     | 3 | 6 |          |   |   | SEMA6D   | 3 |
| MICALCL  | 1 | 0 |          |   |   | GUCY2D   | 3 |
| ITPKB    | 1 | 0 |          |   |   | ARHGAP31 | 3 |
| HLA-A    | 1 | 1 |          |   |   | LLGL1    | 3 |
| FBXW7    | 2 | 1 |          |   |   | FAM135B  | 3 |
| FAM166A  | 1 | 0 |          |   |   | AFF2     | 3 |
| EP300    | 0 | 1 |          |   |   | ATP10A   | 3 |
| DIS3     | 1 | 0 |          |   |   | CNTNAP5  | 3 |
| CTCF     | 1 | 0 |          |   |   | EPPK1    | 3 |
| CREBBP   | 1 | 1 |          |   |   | COL6A1   | 3 |
| COL5A3   | 1 | 2 |          |   |   | CEP162   | 3 |
| CHD4     | 1 | 2 |          |   |   | GTF2I    | 3 |
| CDKN2A   | 1 | 0 |          |   |   | ADAMTS12 | 3 |
| CASP8    | 2 | 1 |          |   |   | MCF2L    | 3 |
| C3orf70  | 0 | 1 |          |   |   | RRP12    | 3 |
| BRE      | 2 | 0 |          |   |   | CIC      | 3 |
| BCLAF1   | 1 | 0 |          |   |   | THSD7A   | 3 |
| ATM      | 1 | 0 |          |   |   | XIRP2    | 3 |
| ANK3     | 2 | 1 |          |   |   | KMT2D    | 3 |
| ALPK2    | 0 | 1 |          |   |   | MROH2A   | 3 |
| ALK      | 1 | 2 |          |   |   | CCDC168  | 3 |
|          |   |   |          |   |   | PLCE1    | 3 |
|          |   |   |          |   |   | CHD5     | 3 |
|          |   |   |          |   |   | ZAN      | 3 |
|          |   |   |          |   |   | CACNA1C  | 3 |
|          |   |   |          |   |   | DMXL2    | 3 |
|          |   |   |          |   |   | COL11A1  | 3 |
|          |   |   |          |   |   | MTOR     | 3 |
|          |   |   |          |   |   | APOB     | 3 |
|          |   |   |          |   |   | ZZEF1    | 3 |
|          |   |   |          |   |   | NBEA     | 3 |
|          |   |   |          |   |   | RYS3     | 3 |
|          |   |   |          |   |   | ANK2     | 3 |
|          |   |   |          |   |   | CSMD2    | 3 |

|  |               |   |
|--|---------------|---|
|  | <i>PKHD1</i>  | 3 |
|  | <i>MUC5AC</i> | 3 |
|  | <i>FRAS1</i>  | 3 |
|  | <i>HUWE1</i>  | 3 |
|  | <i>DNAH11</i> | 3 |
|  | <i>LRP1B</i>  | 3 |
|  | <i>SSPOP</i>  | 3 |
|  | <i>ADGRV1</i> | 3 |
|  | <i>OBSCN</i>  | 3 |
|  | <i>SYNE1</i>  | 3 |
|  | <i>NEB</i>    | 3 |

Table S7: Genes with variants in untranslated regions (UTRs), and the miRNAs that binding by seed region.

| Gene          | miRNA              | miRabel score | Variant alteration | Hybridization codon | LogitProb <sup>1</sup> | $\Delta G_{\text{hybrid}}^2$ | $\Delta G_{\text{total}}^3$ | Site access <sup>4</sup> |
|---------------|--------------------|---------------|--------------------|---------------------|------------------------|------------------------------|-----------------------------|--------------------------|
| <i>CARD11</i> | <i>miR-93-5p</i>   | 0.0019        | c.*18G>A           | 16-21               | 0.542                  | -16.900                      | -10.492                     | 0.458                    |
|               | <i>miR-106b-5p</i> | 0.0042        |                    | 16-21               | 0.501                  | -12.400                      | -5.992                      | 0.458                    |
|               | <i>miR-20b-5p</i>  | 0.0048        |                    | 14-19               | 0.523                  | -19.000                      | -6.226                      | 0.451                    |
|               | <i>miR-20b-5p</i>  | 0.0048        |                    | 14-18               | 0.504                  | -16.700                      | -3.871                      | 0.346                    |
| <i>CSMD3</i>  | <i>miR-1237-3p</i> | 0.0059        | c.-19T>C           | 16-21               | 0.557                  | -26.500                      | -7.866                      | 0.231                    |
|               | <i>miR-1237-3p</i> | 0.0059        |                    | 16-20               | 0.553                  | -18.600                      | -2.889                      | 0.234                    |
|               | <i>miR-1237-3p</i> | 0.0059        |                    | 16-21               | 0.543                  | -22.900                      | -2.955                      | 0.243                    |
|               | <i>miR-224-5p</i>  | 0.0372        |                    | 19-25               | 0.511                  | -17.900                      | -0.541                      | 0.297                    |
|               | <i>miR-224-5p</i>  | 0.0372        |                    | 19-24               | 0.501                  | -17.800                      | -0.608                      | 0.327                    |
|               | <i>miR-132-3p</i>  | 0.0434        |                    | 15-19               | 0.521                  | -21.200                      | -3.702                      | 0.249                    |
| <i>KDR</i>    | <i>miR-331-3p</i>  | 0.0436        | c.*4G>A            | 3-8                 | 0.556                  | -22.900                      | 5.722                       | 0.095                    |
|               |                    |               |                    | 3-7                 | 0.547                  | -20.200                      | 2.942                       | 0.137                    |
| <i>TLX3</i>   | <i>miR-346</i>     | 0.0187        | c.-35C>T           | 30-39               | 0.501                  | -20.300                      | -5.227                      | 0.466                    |

<sup>1</sup> probability of the site being a miRNA binding site as predicted by nonlinear logistic model; <sup>2</sup> measures of stability for miRNA-target hybrid as computed by *RNAhybrid*; <sup>3</sup> measures of the total energy change of the hybridization; <sup>4</sup> measures of structural accessibility as computed by the average probability of a nucleotide being single-stranded (i.e., unpaired) for the nucleotides in the predicted binding site.

Table S8. The top twenty KEGG pathways identified from a spectrum of major genes with somatic variants in HPV-associated Penile Squamous Cell Carcinomas from Latin Americans, ranked by FDR value.

| ID       | KEGG Pathway                   | Observed gene count | Background gene count | Strength | FDR      | Genes                                                                                                                                            |
|----------|--------------------------------|---------------------|-----------------------|----------|----------|--------------------------------------------------------------------------------------------------------------------------------------------------|
| hsa05225 | Hepatocellular carcinoma       | 9                   | 160                   | 1.56     | 1.18e-09 | <i>PIK3CA</i> , <i>RB1</i> , <i>TP53</i> , <i>EGFR</i> , <i>TERT</i> , <i>PTEN</i> , <i>AKT2</i> , <i>CDKN2A</i> and <i>MYC</i>                  |
| hsa05165 | Human papillomavirus infection | 10                  | 325                   | 1.3      | 5.66e-09 | <i>PIK3CA</i> , <i>RB1</i> , <i>TP53</i> , <i>EGFR</i> , <i>NOTCH1</i> , <i>TERT</i> , <i>CASP8</i> , <i>PTEN</i> , <i>ITGA8</i> and <i>AKT2</i> |
| hsa05214 | Glioma                         | 7                   | 72                    | 1.8      | 5.66e-09 | <i>PIK3CA</i> , <i>RB1</i> , <i>TP53</i> , <i>EGFR</i> , <i>PTEN</i> , <i>AKT2</i> and <i>CDKN2A</i>                                             |
| hsa05218 | Melanoma                       | 7                   | 72                    | 1.8      | 5.66e-09 | <i>PIK3CA</i> , <i>RB1</i> , <i>TP53</i> , <i>EGFR</i> , <i>PTEN</i> , <i>AKT2</i> and <i>CDKN2A</i>                                             |
| hsa05224 | Breast cancer                  | 8                   | 145                   | 1.56     | 5.66e-09 | <i>PIK3CA</i> , <i>RB1</i> , <i>TP53</i> , <i>EGFR</i> , <i>NOTCH1</i> , <i>PTEN</i> , <i>AKT2</i> and <i>MYC</i>                                |
| hsa05206 | MicroRNAs in cancer            | 8                   | 160                   | 1.51     | 9.31e-09 | <i>PIK3CA</i> , <i>ERBB3</i> , <i>TP53</i> , <i>EGFR</i> , <i>NOTCH1</i> , <i>PTEN</i> , <i>CDKN2A</i> , <i>MYC</i>                              |
| hsa01522 | Endocrine resistance           | 7                   | 95                    | 1.68     | 1.01e-08 | <i>PIK3CA</i> , <i>RB1</i> , <i>TP53</i> , <i>EGFR</i> , <i>NOTCH1</i> , <i>AKT2</i> and <i>CDKN2A</i>                                           |

|              |                                         |    |     |      |          |                                                                                 |
|--------------|-----------------------------------------|----|-----|------|----------|---------------------------------------------------------------------------------|
| hsa0520<br>0 | Pathways in cancer                      | 11 | 517 | 1.14 | 1.01e-08 | <i>PIK3CA, RB1, TP53, EGFR, NOTCH1, TERT, CASP8, PTEN, AKT2, CDKN2A and MYC</i> |
| hsa0521<br>3 | Endometrial cancer                      | 6  | 57  | 1.84 | 2.44e-08 | <i>PIK3CA, TP53, EGFR, PTEN, AKT2 and MYC</i>                                   |
| hsa0516<br>6 | Human T-cell leukemia virus 1 infection | 8  | 211 | 1.39 | 4.61e-08 | <i>PIK3CA, RB1, TP53, TERT, PTEN, AKT2, CDKN2A and MYC</i>                      |
| hsa0516<br>3 | Human cytomegalovirus infection         | 8  | 218 | 1.38 | 5.37e-08 | <i>PIK3CA, RB1, TP53, EGFR, CASP8, AKT2, CDKN2A and MYC</i>                     |
| hsa0522<br>3 | Non-small cell lung cancer              | 6  | 68  | 1.76 | 5.37e-08 | <i>PIK3CA, RB1, TP53, EGFR, AKT2 and CDKN2A</i>                                 |
| hsa0523<br>0 | Central carbon metabolism in cancer     | 6  | 69  | 1.75 | 5.37e-08 | <i>PIK3CA, TP53, EGFR, PTEN, AKT2 and MYC</i>                                   |
| hsa0521<br>2 | Pancreatic cancer                       | 6  | 73  | 1.73 | 6.31e-08 | <i>PIK3CA, RB1, TP53, EGFR, AKT2 and CDKN2A</i>                                 |
| hsa0415<br>1 | PI3K-Akt signaling pathway              | 9  | 350 | 1.22 | 6.49e-08 | <i>PIK3CA, ERBB3, TP53, EGFR, ERBB4, PTEN, ITGA8, AKT2 and MYC</i>              |
| hsa0522<br>0 | Chronic myeloid leukemia                | 6  | 75  | 1.72 | 6.49e-08 | <i>PIK3CA, RB1, TP53, AKT2, CDKN2A and MYC</i>                                  |
| hsa0522<br>6 | Gastric cancer                          | 7  | 144 | 1.5  | 6.57e-08 | <i>PIK3CA, RB1, TP53, EGFR, TERT, AKT2 and MYC</i>                              |
| hsa0421<br>8 | Cellular senescence                     | 7  | 150 | 1.48 | 8.15e-08 | <i>PIK3CA, RB1, TP53, PTEN, AKT2, CDKN2A and MYC</i>                            |
| hsa0401<br>2 | ErbB signaling pathway                  | 6  | 83  | 1.67 | 9.61e-08 | <i>PIK3CA, ERBB3, EGFR, ERBB4, AKT2 and MYC</i>                                 |
| hsa0516<br>0 | Hepatitis C                             | 7  | 156 | 1.47 | 9.61e-08 | <i>PIK3CA, RB1, TP53, EGFR, CASP8, AKT2 and MYC</i>                             |
